# Supplementary material
Source: publisher figshare collection journal article supplement (https://gsajournals.figshare.com/ndownloader/files/13471511)
Supplement: Supplementary file 1 [file 13471511]

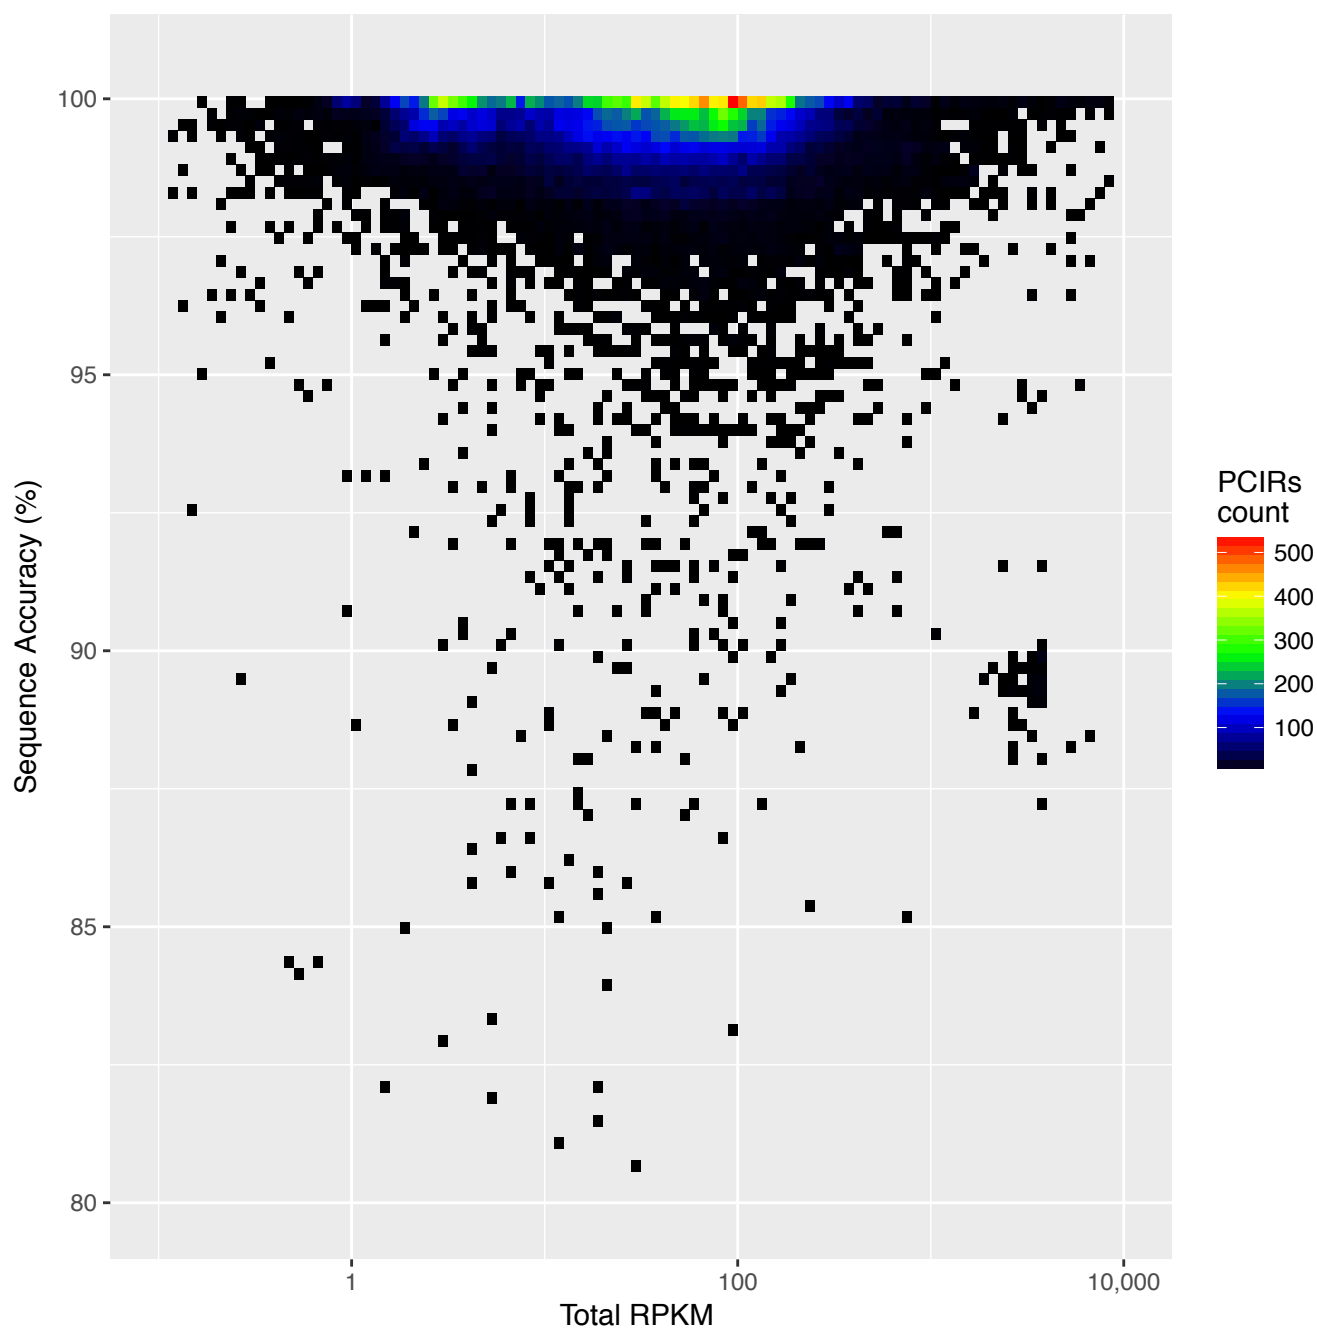

**Figure S2: Evaluation of the impact of the expression level on Iso-Seq sequence accuracy.**  
Density plot describing the distribution of PCIRs (polished-clustered Iso-Seq reads) based on the measured sequence accuracy and the cumulative expression value measured using RNA-seq.
